# Supplementary material for: Time-resolved polarized light imaging of sheared materials: application to polymer crystallization
Source: Royal Society of Chemistry journal article supplement (doi:10.1039/c0sm00332h), 2010-01-01

## Supporting information

### **Time-resolved polarized light imaging of sheared materials: application to polymer crystallization.**

Oleksandr O. Mykhaylyk

*Department of Chemistry, University of Sheffield, Sheffield, S3 7HF, UK*

The folder of supporting information contains montages of polarized light video (\*.avi) and montages of video frames (\*.jpg) of shear-induced crystallization of polymer melt (polyethylene, HDPE) acquired at two different shear conditions (Table). The shear pulses have been performed at 398 K. The scale of the frames is 18 mm.

**Table.**

|   | <i>Files</i>                                                 | <i>Conditions of shear</i>                                                                                                                                         | <i>Temperature conditions</i>           | <i>Number of video frames and frame rate</i>                                             |
|---|--------------------------------------------------------------|--------------------------------------------------------------------------------------------------------------------------------------------------------------------|-----------------------------------------|------------------------------------------------------------------------------------------|
| 1 | omega0667time7_398Kmontage.jpg                               | angular acceleration $\alpha = 0.333 \text{ rad/s}^2$ , maximum angular speed $\Omega_{\text{max}} = 0.667 \text{ rad/s}$ and time of shearing $t_s = 7 \text{ s}$ | T = 398 K for 60 s and then cooled down | 600 frames, first 200 frames at 0.2 s per frame and the rest 400 frames at 1 s per frame |
| 2 | omega0667time22_398Kmontage.jpg<br>omega0667time22_398Ks.avi | $\alpha = 0.333 \text{ rad/s}^2$ , $\Omega_{\text{max}} = 0.667 \text{ rad/s}$ and $t_s = 22 \text{ s}$                                                            | T = 398 K for 60 s and then cooled down | 600 frames, $200 \times 0.2 \text{ s}$ and $400 \times 1 \text{ s}$                      |



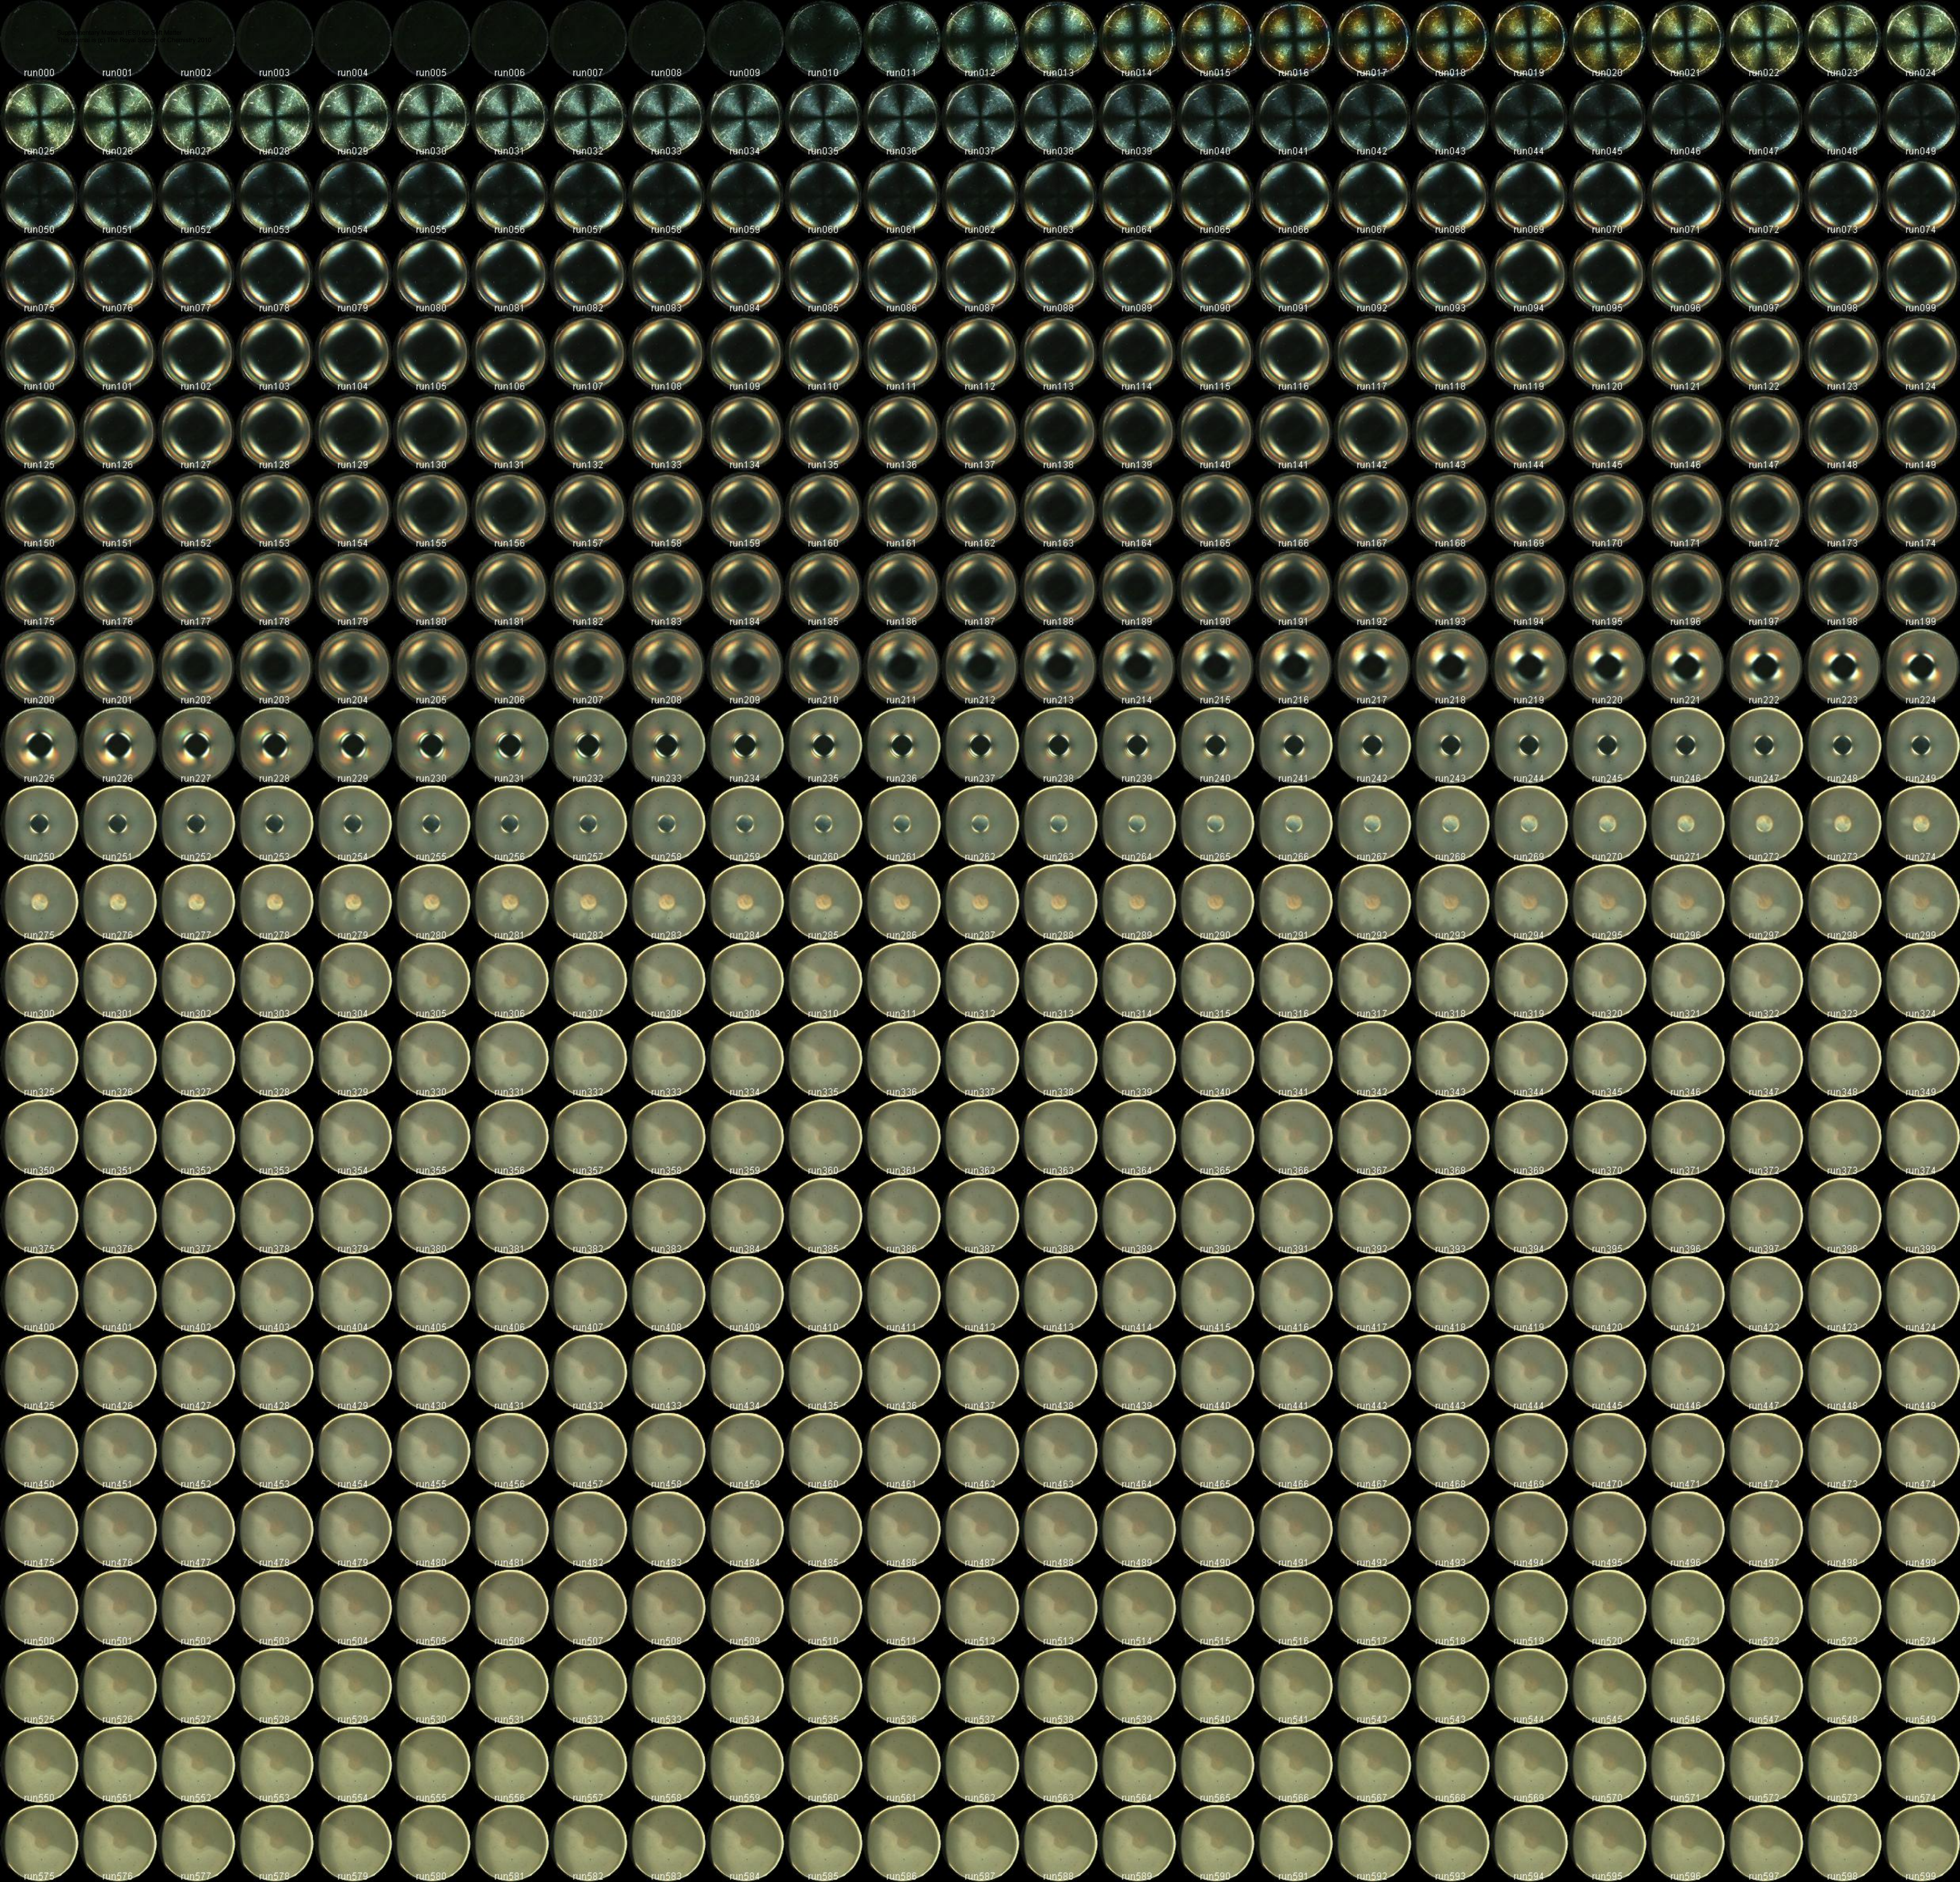



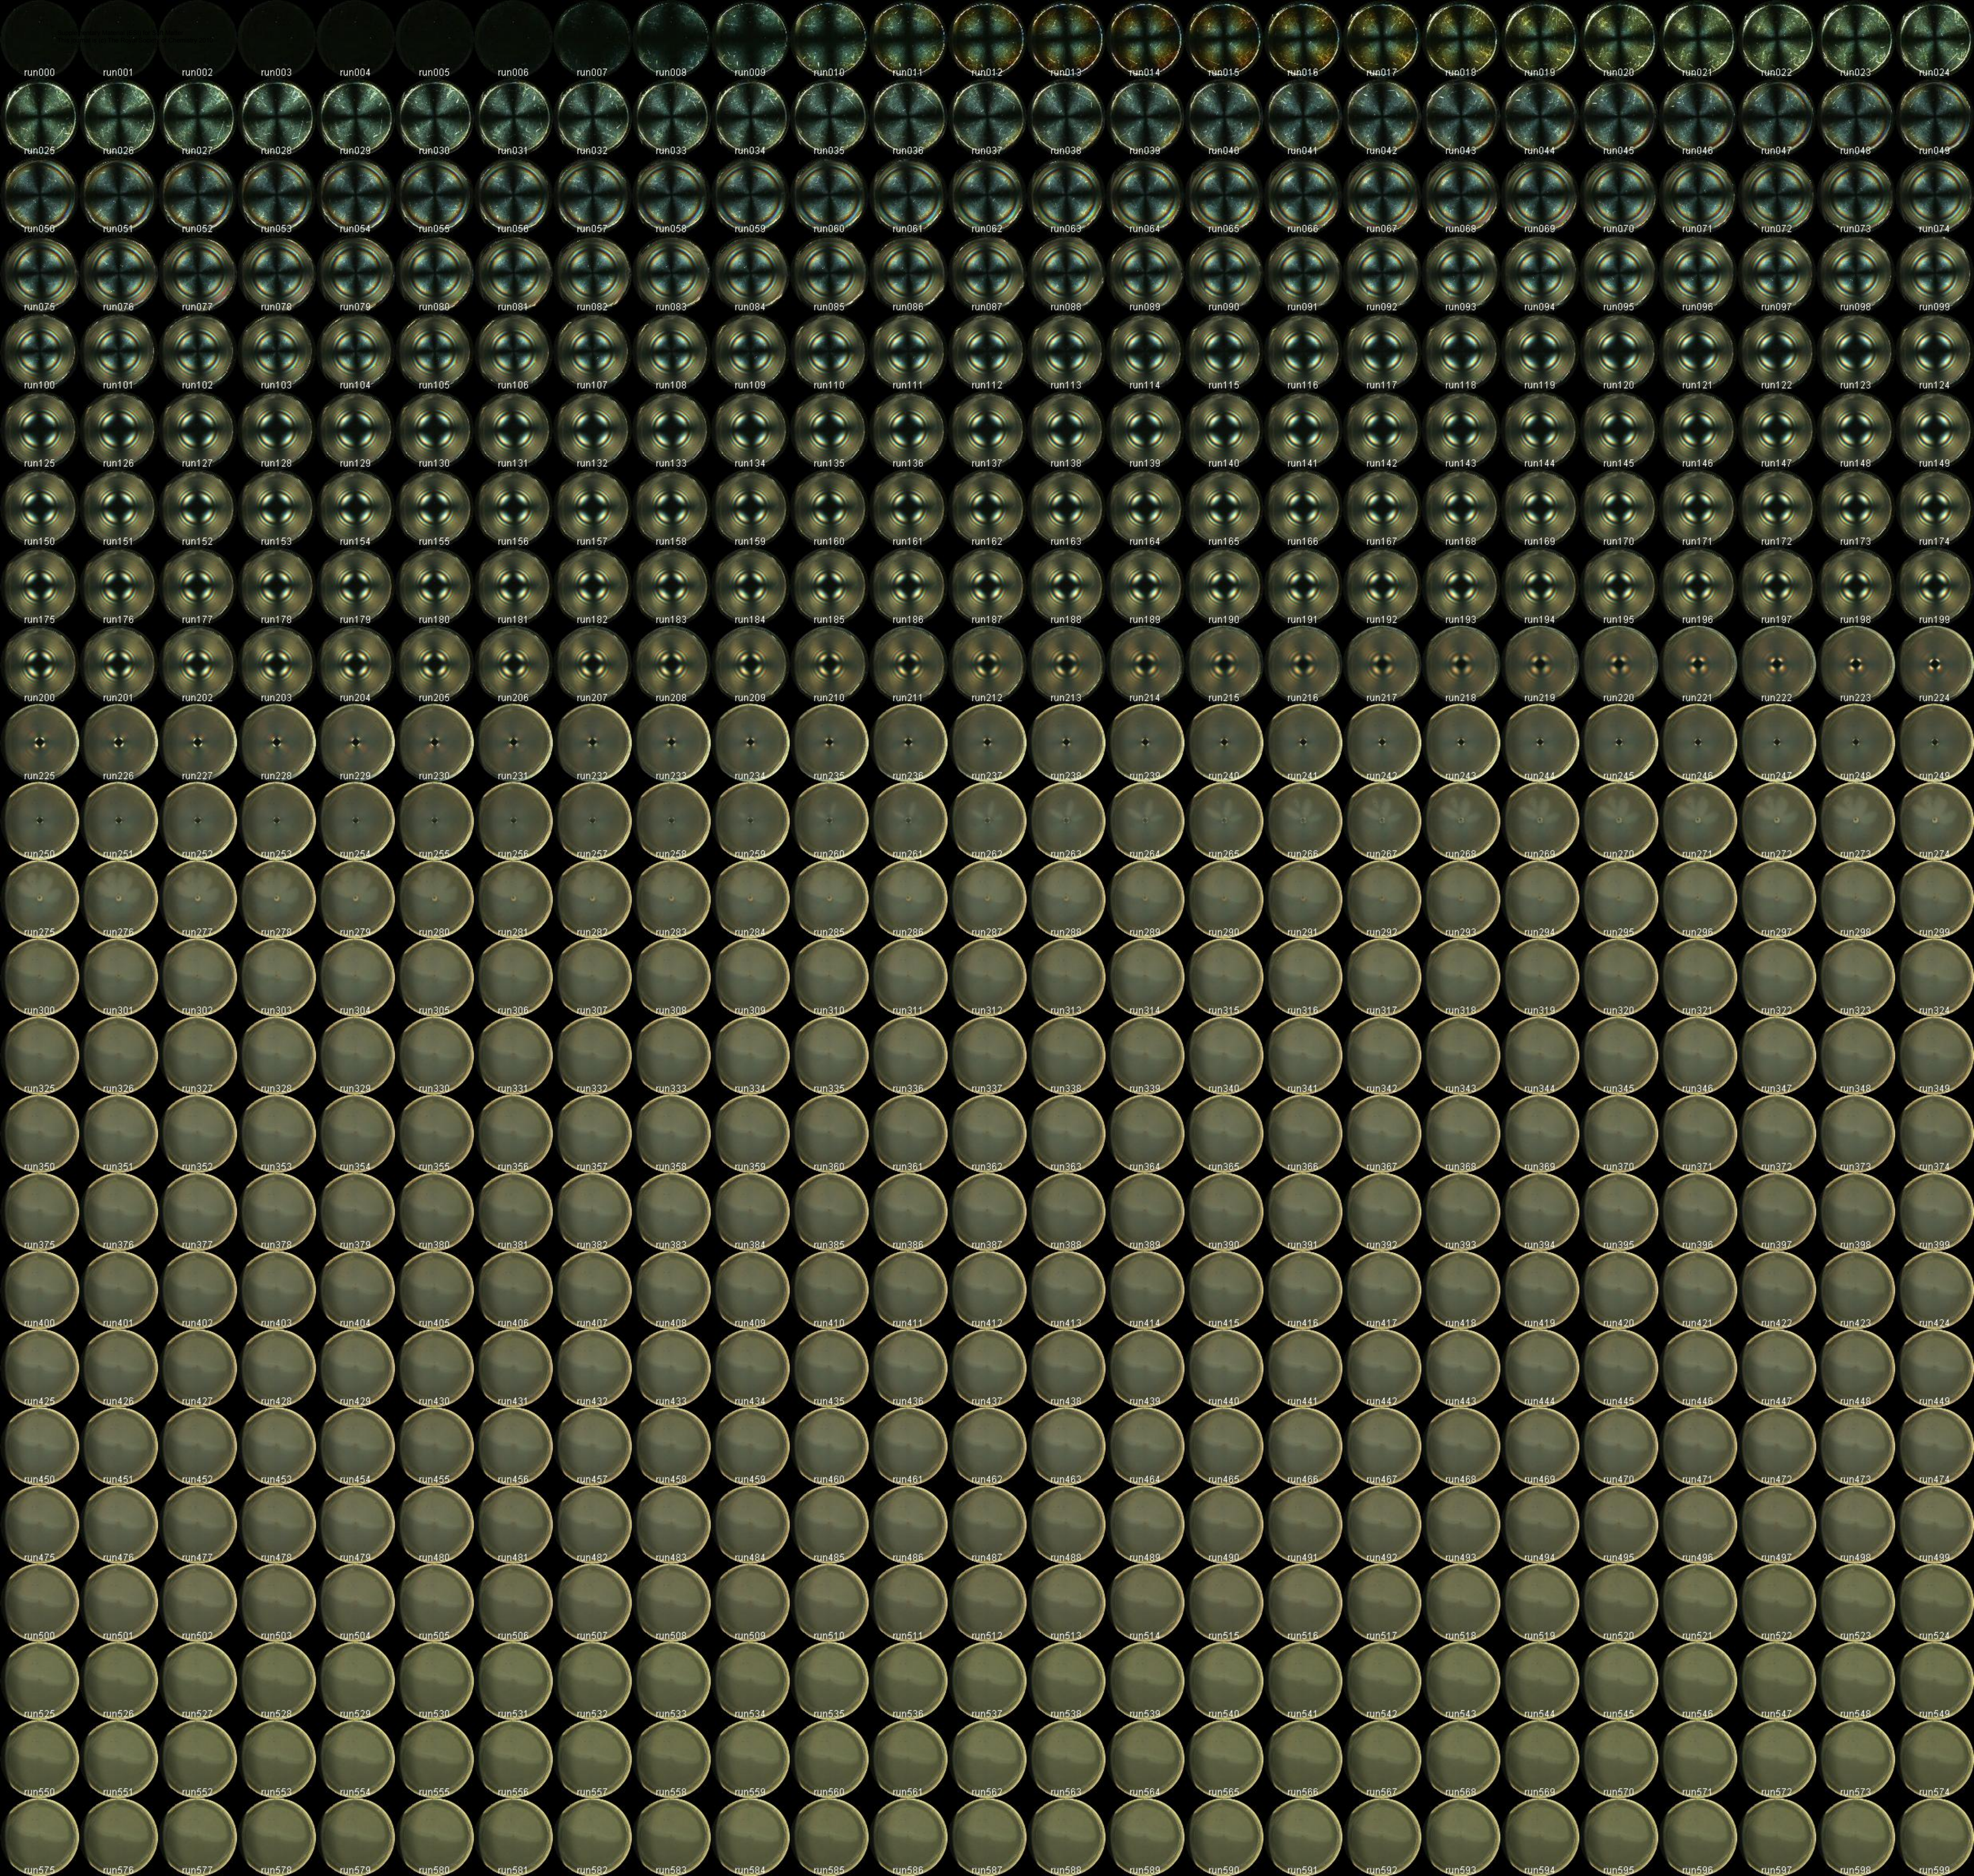

Supplement: c0sm00332h.pdf [file c0sm00332h.pdf]
